# Supplementary material for: A three-year prospective study of the presentation and clinical outcomes of major bleeding episodes associated with oral anticoagulant use in the UK (ORANGE study)
Source: PubMed Central journal article supplement — Haematologica. 2018 Jan 25;103(4):738–45. doi: 10.3324/haematol.2017.182220 (PMC5865412; doi:10.3324/haematol.2017.182220), 2018-04
Supplement: 2017_182220-Disclosures_and_Contributions.pdf [file 2017_182220-Disclosures_and_Contributions.pdf]

Haematologica  
HAEMATOL/2017/182220  
Version 4

A three-year prospective study of the presentation and clinical outcomes of major bleeding episodes associated with oral anticoagulant use in the UK (ORANGE study)

Laura Green, Joachim Tan, Joan K Morris, Raza Alikhan, Nicola Curry, Tamara Everington, Rhona Mclean, Khalid Saja, Simon Stanworth, Campbell Tait, and Peter MacCallum

**Disclosures:** Funding The study was funded by the British Society for Haematology Early Stage Researcher Fellowship awarded to Dr Laura Green. The views expressed in this publication are those of the authors and not those of the funder. The funder had no role in the study design, data collection/analysis or preparation of this article. Competing interests: All authors declare the following: LG, JKM, JT, NC, TE and SS have no conflicts of interest to disclose. RA has received honorarium from Bayer, Daiichi-Sankyo, Boehringer Ingelheim and BMS/Pfizer. KS has received honorarium from Bayer, BMS/Pfizer and Boehringer Ingelheim. RM has received travel expenses for scientific meeting from Bayer. CT has received consultancy and speaker honoraria, and travel support to attend scientific meetings from Bayer and Boehringer Ingelheim, and consultancy honoraria from BMS/Pfizer. PM has served as a speaker for Bayer and Daiichi-Sankyo, as a consultant for Daiichi-Sankyo, and has received travel support from Boehringer Ingelheim.

**Contributions:** LG, PM, JM and JT designed the study, wrote the manuscript and made all subsequent revisions. JM and JT performed the analysis. RA, NC, TE, RM, KS, SS and CT contributed to the design of the study, collection of the data and writing of the manuscript.
